# Supplementary material for: Non-enzymatic oxalic acid sensor using platinum nanoparticles modified on graphene nanosheets
Source: Royal Society of Chemistry journal article supplement (doi:10.1039/c3nr00848g), 2013-01-01
Supplement: c3nr00848g.pdf [file c3nr00848g.pdf]

# Supporting information

## Nonenzymatic Oxalic Acid Sensor Using Platinum Nanoparticles Modified on Graphene Nanosheets

Xiao-mei Chen<sup>a,c,\*</sup>, Zhi-xiong Cai<sup>d</sup>, Zhi-yong Huang<sup>a</sup>, Munetaka Oyama<sup>c</sup>, Yaqi Jiang<sup>b</sup>, Xi Chen<sup>b,\*</sup>,

<sup>a</sup>*College of Biological Engineering, Jimei University, Xiamen, 361021, China*

<sup>b</sup>*Department of Chemistry, College of Chemistry and Chemical Engineering, and State Key Laboratory of Marine Environmental Science, Xiamen University, Xiamen, 361005, China*

<sup>c</sup>*Department of Material Chemistry, Graduate School of Engineering, Kyoto University, Nishikyo-ku, Kyoto, 615-8520, Japan*

<sup>d</sup>*Ministry of Education Key Laboratory of Analysis and Detection Technology for Food Safety, Fuzhou University, Fuzhou, 350002, China*

Email: [xichen@xmu.edu.cn](mailto:xichen@xmu.edu.cn)

Tel: (86)-592-2184530, Fax: (86)-592-2184530.

---

\* Corresponding author. Tel: +86 592 2184530; Fax: +86 592 2184530;  
E-mail address: [xichen@xmu.edu.cn](mailto:xichen@xmu.edu.cn)

## Supplementary Results

**Table S1** Summary of oxidation potential peak ( $E_p$ ), current peak ( $I_p$ ), electrochemical active surface areas (ECSAs) and current density ( $j$ ) of OA on different electrodes.

**Table S2** Comparison of different OA sensors in terms of LOD and linear range.

**Table S3** Recovery data for spinach samples added with different OA concentrations.

**Table S1** Summary of oxidation potential peak ( $E_p$ ), current peak ( $I_p$ ), electrochemical active surface areas (ECSAs) and current density ( $j$ ) of OA on different electrodes.

| <b>Electrodes</b> | <b><math>E_p</math> (V vs SCE)</b> | <b><math>I_p</math> (mA)</b> | <b>ECSAs (<math>\text{cm}^2</math>)</b> | <b><math>j</math> (<math>\text{mA cm}^{-2}</math>)</b> |
|-------------------|------------------------------------|------------------------------|-----------------------------------------|--------------------------------------------------------|
| <b>GNs</b>        | <b>1.45</b>                        | <b>0.73</b>                  | --                                      | --                                                     |
| <b>PtNFs</b>      | <b>0.85</b>                        | <b>0.82</b>                  | <b>0.21</b>                             | <b>3.91</b>                                            |
| <b>PtNPGNs</b>    | <b>1.05</b>                        | <b>1.17</b>                  | <b>0.18</b>                             | <b>6.50</b>                                            |
| <b>PtC</b>        | <b>1.03</b>                        | <b>0.48</b>                  | <b>0.17</b>                             | <b>2.82</b>                                            |

**Table S2** Comparison of different OA sensors in terms of LOD and linear range.

| OA sensor                             | LOD <sup>a</sup> (μM) | Linear range (mM) | References |
|---------------------------------------|-----------------------|-------------------|------------|
| Rh(Pc)/C <sup>b</sup>                 | 1.0                   | ~0.3              | [1]        |
| SiO <sub>2</sub> /C/CoPc <sup>c</sup> | 0.58                  | 0.0398~ 0.046     | [2]        |
| MWNTs                                 | 12                    | 0.05~ 150         | [3]        |
| PdNPs/PAMAM/MWNTs <sup>d</sup>        | 20                    | 0.03~5.0          | [4]        |
| PdNPs/CNF <sup>e</sup>                | 200                   | 0.2~13; 13~45     | [5]        |
| EG-PS <sup>f</sup>                    | 50                    | 0.5~3             | [6]        |
| PtNPGNs                               | 10                    | 0.1-15; 15-50     | This work  |

<sup>a</sup>LOD: the limit of detection;

<sup>b</sup>Rh(Pc)/C: Rhodium phthalocyanin/C;

<sup>c</sup>SiO<sub>2</sub>/C/CoPc: SiO<sub>2</sub>/C/cobalt phthalocyanine;

<sup>d</sup>PdNPs/PAMAM/MWNTs: Palladium nanoparticles/polyamidoamine/MWNTs;

<sup>e</sup>PdNPs/CNF: Palladium nanoparticle/carbon nanofiber;

<sup>f</sup>EG-PS: Exfoliated graphite-polystyrene.

## Reference

- 1 S. Yamazaki, N. Fujiwara, K. Yasuda, *Electrochim. Acta* 2010, **55**, 753.
- 2 A. Rahim, S.B.A. Barros, L.T. Arenas, Y. Gushikem, *Electrochim. Acta* 2011, **56**, 1256.
- 3 Y.Q. Zheng, C.Z. Yang, W.H. Pu, J.D. Zhang, *Food Chem.* 2009, **114**, 1523.
- 4 H. Ahmar, A.R. Fakhari, M.R. Nabid, S.J.T. Rezaei, Y. Bide, *Sens. Actuators, B* 2012, **171-172**, 611.
- 5 Y. Liu, J. Huang, D. Wang, H. Hou, T. You, *Anal. Methods* 2010, **2**, 855.
- 6 F. Manea, C. Radovan, I. Corb, A. Pop, G. Burtica, P. Malchev, S. Picken, J. Schoonman, *Sensors* 2007, **7**, 615.

**Table S3** Recovery data for spinach samples added with different OA concentrations.

| Sample         | No. | Amount<br>(mM) | Added<br>(mM) | Found<br>(mM) | Recovery<br>(%) | R.S.D. <sup>d</sup><br>(%) |
|----------------|-----|----------------|---------------|---------------|-----------------|----------------------------|
| 1 <sup>a</sup> | 1   | 2.32           | 1.00          | 3.35          | 103.0           | 5.31                       |
|                | 2   | 2.27           | 2.00          | 4.25          | 99.0            | 4.57                       |
|                | 3   | 2.41           | 4.00          | 6.48          | 101.8           | 3.14                       |
| 2 <sup>b</sup> | 1   | 2.05           | 1.00          | 3.10          | 105.0           | 4.89                       |
|                | 2   | 1.89           | 2.00          | 3.94          | 102.5           | 3.90                       |
|                | 3   | 1.93           | 4.00          | 6.02          | 102.3           | 3.57                       |
| 3 <sup>c</sup> | 1   | 2.48           | 1.00          | 3.44          | 96.0            | 5.04                       |
|                | 2   | 2.61           | 2.00          | 4.68          | 103.5           | 4.69                       |
|                | 3   | 2.57           | 4.00          | 6.50          | 98.2            | 2.04                       |

<sup>a, b, c</sup> the spinach samples from the stem-leaf mixture, leaf and stem, respectively.

<sup>d</sup> R.S.D. were calculated from five separate experiments.
